# Supplementary material for: Ionozyme: ionic liquids as solvent and stabilizer for efficient bioactivation of CO2
Source: Royal Society of Chemistry journal article supplement (doi:10.1039/d1gc02503a), 2021-01-01
Supplement: d1gc02503a1.pdf [file d1gc02503a1.pdf]

## Supporting Information

### Ionozyme: ionic liquids as solvent and stabilizer for efficient bioactivation of CO<sub>2</sub>

Xiuling Ji,<sup>[a, #]</sup> Yaju Xue,<sup>[a, #]</sup> Zhuang Li,<sup>[a]</sup> Yanrong Liu,<sup>[d]</sup> Lei Liu,<sup>[a]</sup> Peter Kamp Busk,<sup>[e]</sup> Lene Lange,<sup>[f]</sup>  
Yuhong Huang<sup>\*[a,b,c]</sup>, and Suojiang Zhang<sup>\*[a,b]</sup>

---

[a] Beijing Key Laboratory of Ionic Liquids Clean Process, CAS Key Laboratory of Green Process and Engineering, State Key Laboratory of Multiphase Complex Systems, Institute of Process Engineering, Chinese Academy of Sciences, Beijing 100190, China

[b] Innovation Academy for Green Manufacture, Chinese Academy of Sciences, Beijing 100190, China

[c] Dalian National Laboratory for Clean Energy, CAS, Dalian 116023, China

[d] Energy Engineering, Division of Energy Science, Luleå University of Technology, Luleå, Sweden

[e] Department of Science and Environment, Roskilde University, Universitetsvej 1, 4000 Roskilde, Denmark

[f] Bioeconomy, Research & Advisory, Copenhagen, 2500 Valby, Denmark

# Authors contributed equally.

## Supplementary Figures

**Figure S1.** Phylogenetic analysis of the FDHs.

**Figure S2.** Peptides in the region of NADH binding sites and active site for PPR group 1.

**Figure S3.** Sequences alignment of the predicted FDHs after the PPR prediction and phylogenetic analysis.

**Figure S4.** SDS-PAGE profile for the selected FDHs.

**Figure S5.** Biocatalytic performance of the recombinant FDHs.

**Figure S6.** Effect of pH and temperature on enzyme activity of FDHPa.

**Figure S7.** Screening of ILs.

**Figure S8.**  $\sigma$ -Profiles prediction by COSMO-RS.

**Figure S9.** Optimization of reaction conditions for the ionozymes.

**Figure S10.** Analysis of determining conditions on catalytic activity of ionozymes.

**Figure S11.** Root mean square deviation (RMSD) of ionozymes.

**Figure S12.** Structural comparison of FDHPa (red) and FDHCb (blue).

**Figure S13.** Calibration Curve of FDHPa.

**Figure S14.** Calibration Curve of NADH.

**Figure S15.** Proposed hydride transfer process from NADH to CO<sub>2</sub> in ionozymes (FDHPa-[CH][Pro] and FDHPa-[TMGH][PhO]).

## Supplementary Tables

**Table S1.** Kinetic analysis of ionozymes based on Michaelis–Menten equation.

**Table S2.** Full name and structure of IL cations

**Table S3.** Full name and structure of IL anions.

## Supplementary Figures

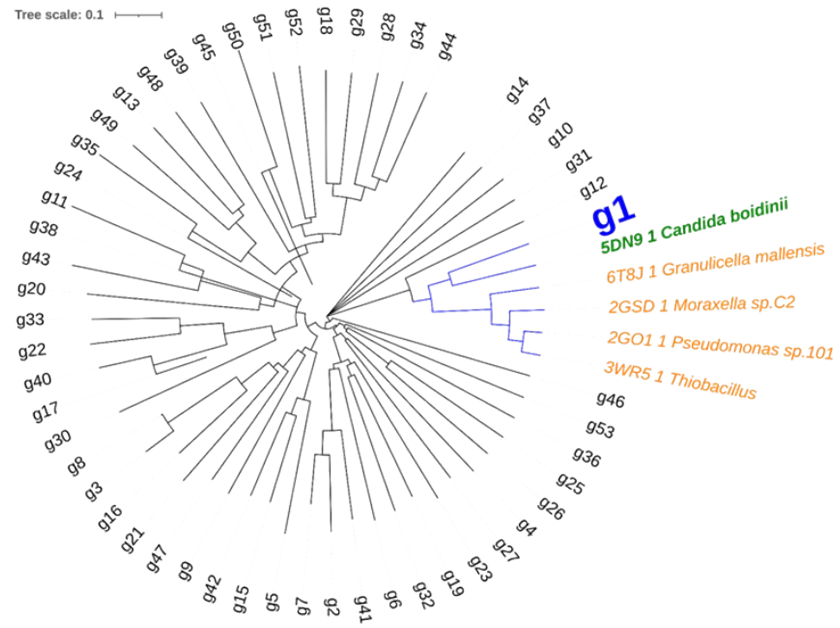

**Figure S1.** Phylogenetic analysis of the FDHs. Phylogenetic tree of the top one ranking FDH protein sequences in 53 unique PPR groups and the well characterized FDH protein sequences.

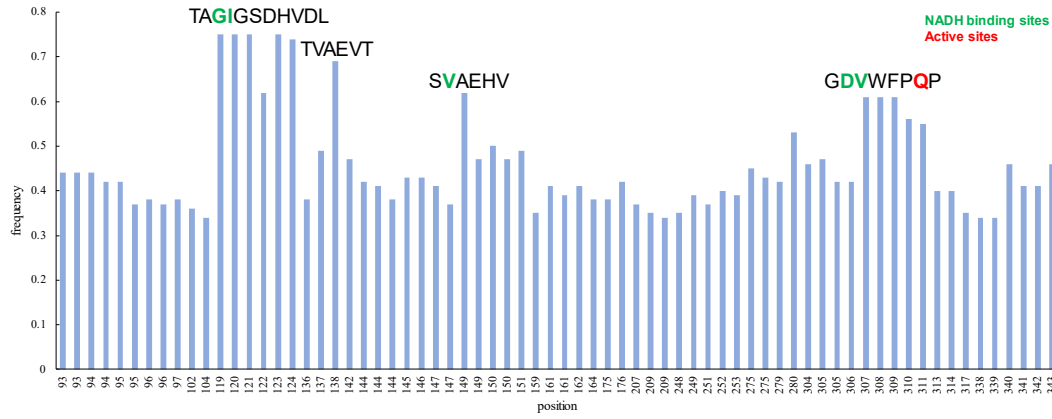

Figure S2. Peptides in the region of NADH binding sites and active site for PPR group 1.

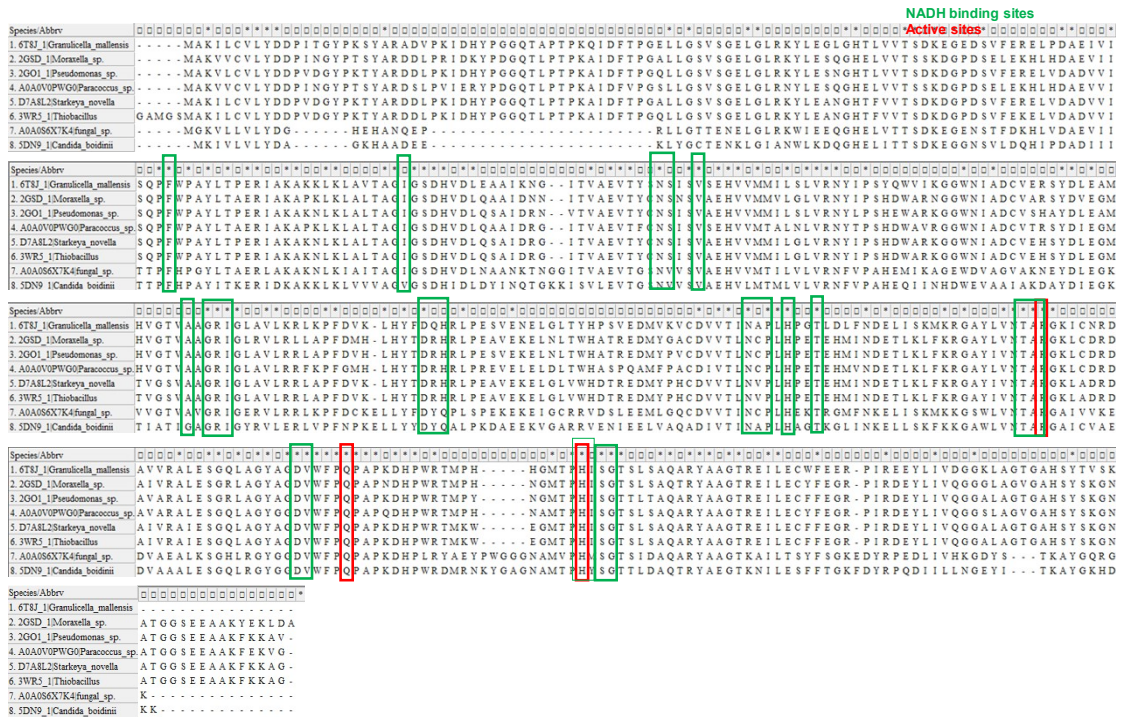

Figure S3. Sequences alignment of the predicted FDHs after the PPR prediction and phylogenetic analysis. The possible NADH

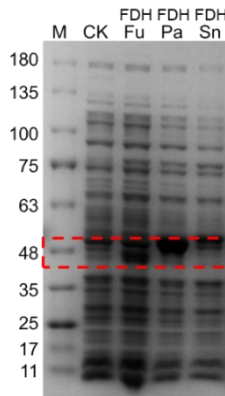

binding sites and active sites are boxed in green and red color, respectively.

Figure S4. SDS-PAGE profile for the selected FDHs. Lane 1 M (marker), lane 2 CK (control check), lane 3 FDHFu from fungal sp. No.11243, lane 4 FDHPa from *Paracoccus* sp., lane 5 FDHsn from *Starkeya novella*.

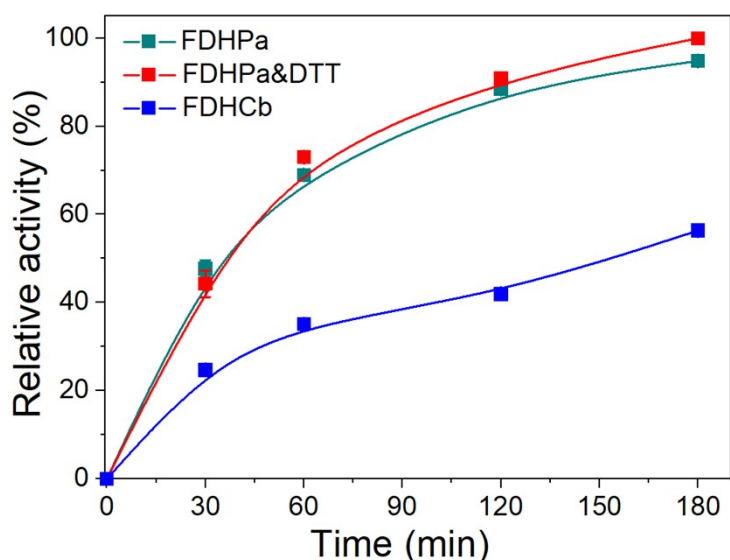

**Figure S5.** Biocatalytic performance of the recombinant FDHs. Enzyme activities of FDHCb and FDHPa with or without DTT for CO<sub>2</sub> conversion at pH 7.0, 25 °C.

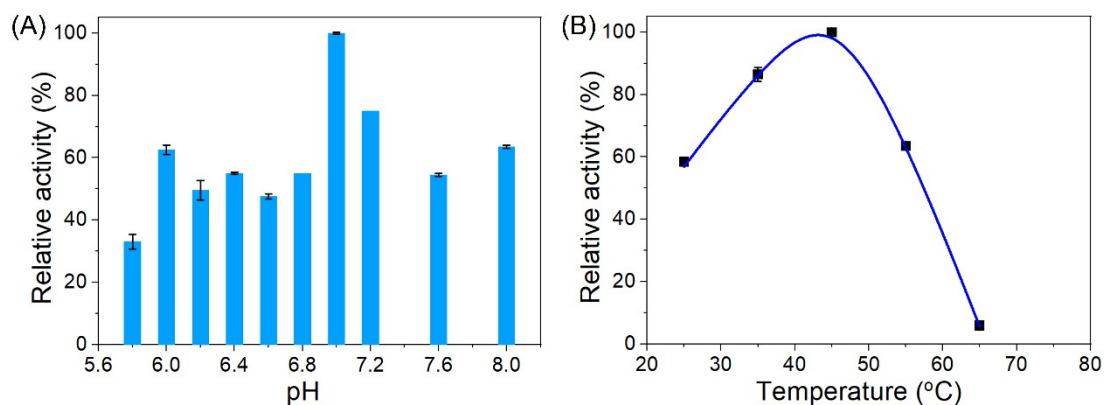

**Figure S6.** Effect of pH and temperature on enzyme activity of FDHPa. (A) Relative activity as a function of pH. (B) Relative activity observed as a function of temperature. Enzyme assays were carried out in the presence of NaHCO<sub>3</sub> (50 mM). The optimum pH for recombinant FDHPa activity was determined by incubating the reaction mixture at 25 °C, while the optimum temperature was at pH 7.0 with PB (100 mM). Activities at the optimal temperature and pH were defined as 100%. Each value represented the mean of triplicate measurements.

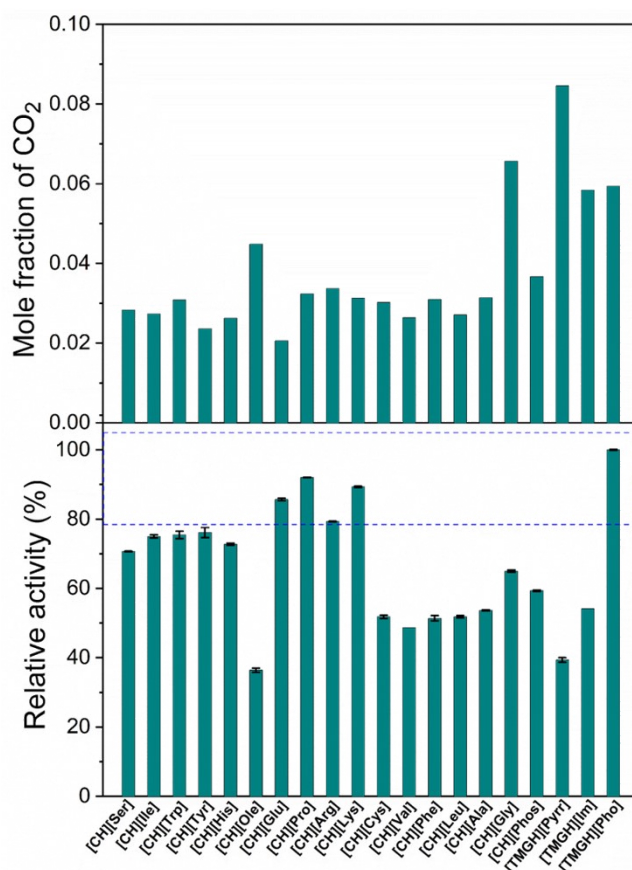

**Figure S7.** Screening of ILs. (A) Prediction of CO<sub>2</sub> solubility by COSMO-RS model. (B) Relative activity of FDHPa in 20 different kinds of biocompatible ILs (0.05%). Activity in [TMGH][PhO] were defined as 100%. Each value represented the mean of triplicate measurements.

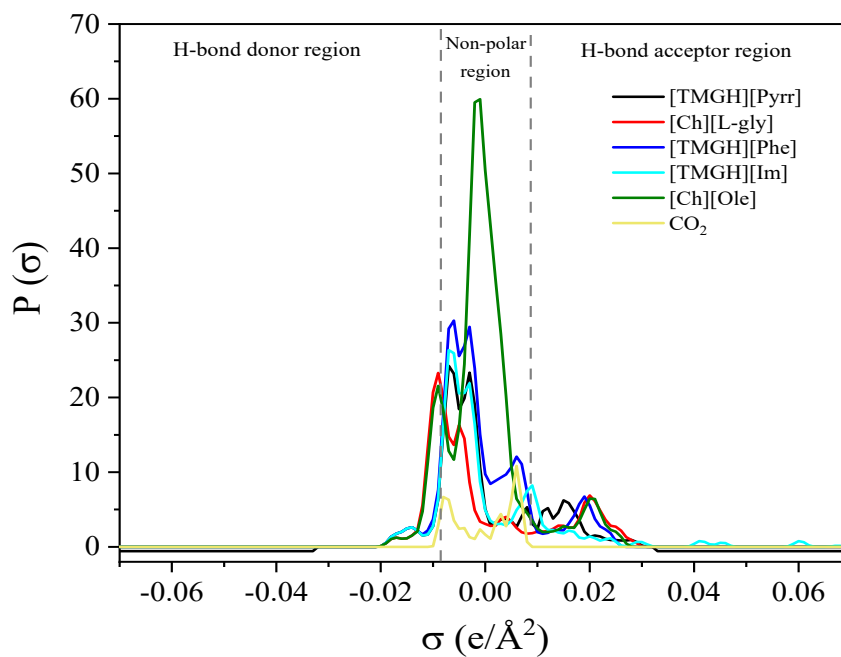

**Figure S8.**  $\sigma$ -Profiles prediction by COSMO-RS.  $\sigma$ -Profiles of [TMGH][Pyr] (black line), [CH][Gly] (red line), [TMGH][Phe] (blue line), [TMGH][Im] (Cyan line), [CH][Ole] (Olive line) and CO<sub>2</sub> (yellow line).

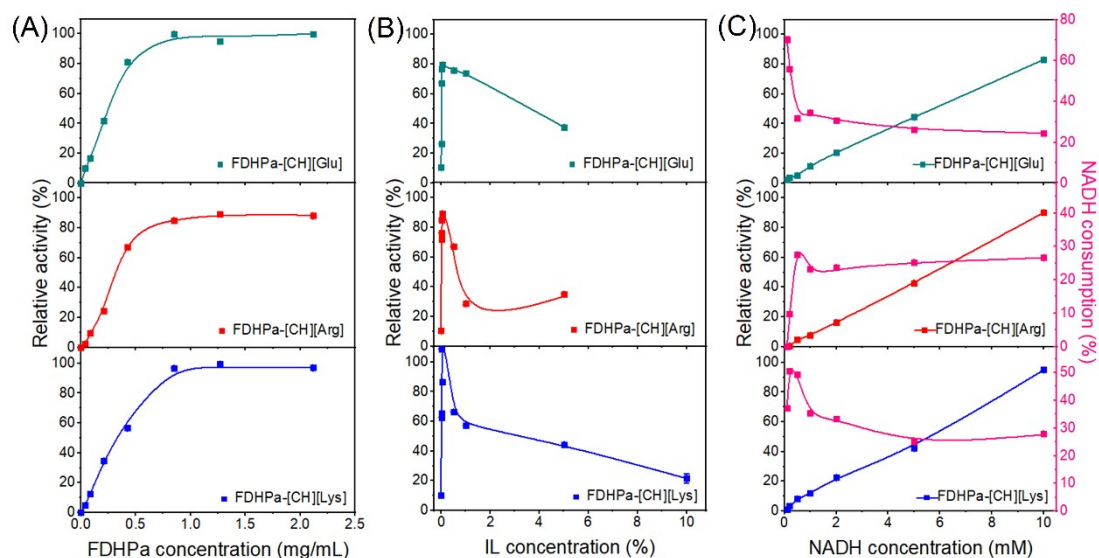

**Figure S9.** Optimization of reaction conditions for the ionozymes. (A) FDHPa concentration effect. (B) ILs ([CH][Glu], [CH][Arg] and [CH][Lys]) concentration effect. (C) NADH concentration effect on ionozyme activities. Enzyme assays were carried out under standard conditions in the presence of  $\text{CO}_2$ . Activities at the optimal concentration were defined as 100%. Each value represented the mean of triplicate measurements.

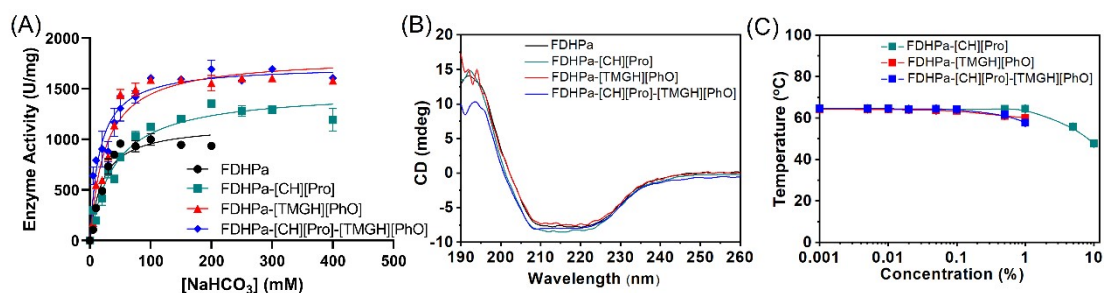

**Figure S10.** Analysis of determining conditions on catalytic activity of FDHPa and FDHPa-ILs. (A) Kinetic analysis based on Michaelis-Menten equation. (B) Far-UV CD spectra. (C) Thermal stability.

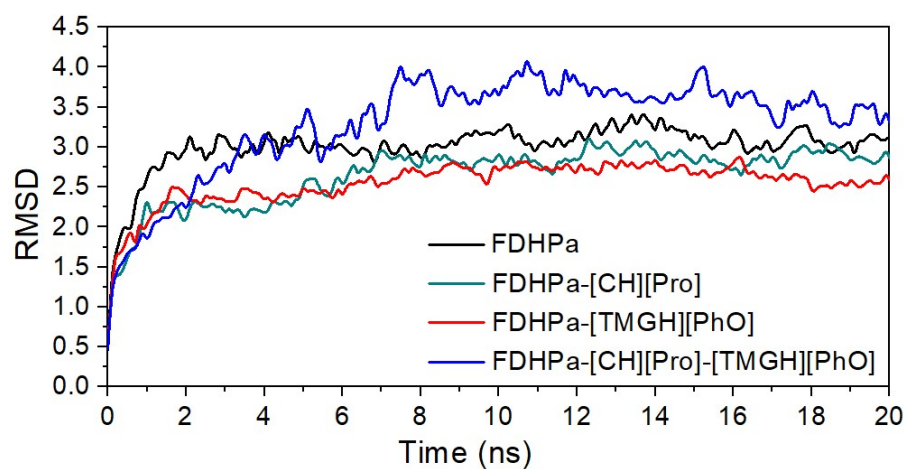

**Figure S11.** Root mean square deviation (RMSD) of FDHPa and FDHPa-ILs. All simulations were carried out at 25  $^{\circ}\text{C}$ .



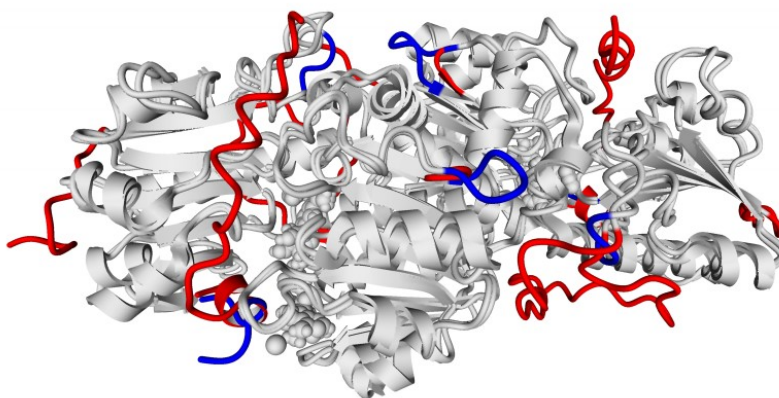

**Figure S12.** Structural comparison of FDHPa (red) and FDHCb (blue).

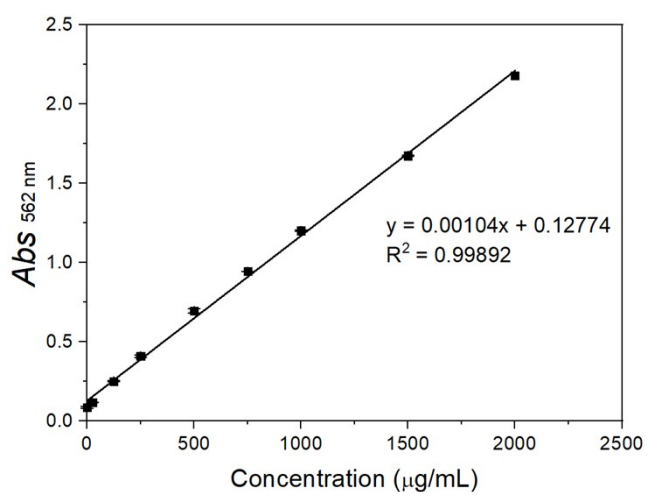

**Figure S13.** Calibration Curve. Absorbance of FDHPa at 562 nm as a function of concentration.

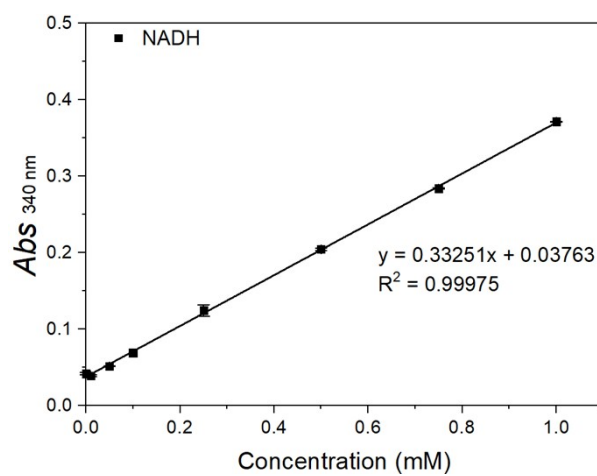

**Figure S14.** Calibration Curve. Absorbance of NADH at 340 nm as a function of concentration.



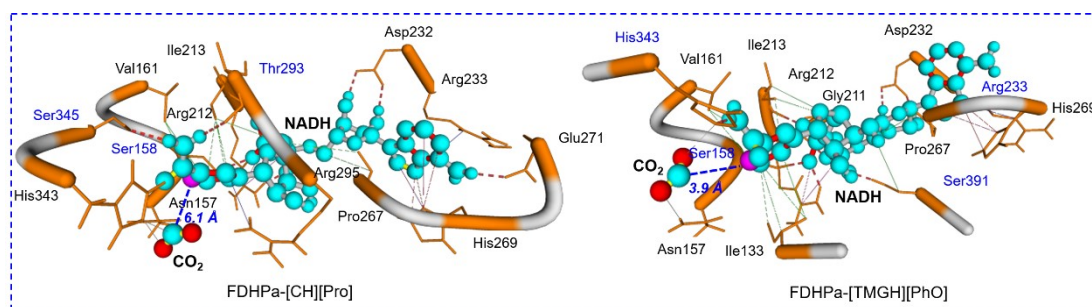

**Figure S15.** Proposed hydride transfer process from NADH to CO<sub>2</sub> in ionozymes. The binding models of NADH and CO<sub>2</sub> in the active sites of FDHPa-[CH][Pro] and FDHPa-[TMGH][PhO].

## Supplementary Tables

**Table S1.** Kinetic analysis of ionozymes based on Michaelis–Menten equation.

| Ionozymes                   | $K_m$ (mM) | $K_{cat}$ (s <sup>-1</sup> ) | $V_{max}$ (U mg <sup>-1</sup> ) | $K_{cat}/K_m$ (s <sup>-1</sup> mM <sup>-1</sup> ) |
|-----------------------------|------------|------------------------------|---------------------------------|---------------------------------------------------|
| FDHPa                       | 20.14      | 0.1839                       | 1148                            | 0.0091                                            |
| FDHPa-[CH][Pro]             | 40.61      | 0.2244                       | 1484                            | 0.0055                                            |
| FDHPa-[TMGH][PhO]           | 25.35      | 0.2724                       | 1812                            | 0.0107                                            |
| FDHPa-[CH][Pro]-[TMGH][PhO] | 15.74      | 0.2595                       | 1782                            | 0.0165                                            |

**Table S2.** Full name and structure of IL cations.

| No. | Full name              | Abbreviation | Structure | COSMO sigma surface |
|-----|------------------------|--------------|-----------|---------------------|
| 1   | Choline                | CH           |           |                     |
| 2   | Tetramethylguanidinium | TMGH         |           |                     |

**Table S3.** Full name and structure of IL anions.

| No. | Full name            | Abbreviation                                | Structure | COSMO sigma surface |
|-----|----------------------|---------------------------------------------|-----------|---------------------|
| 1   | L-glycinate          | Gly                                         |           |                     |
| 2   | L-alaninate          | Ala                                         |           |                     |
| 3   | L-valinate           | Val                                         |           |                     |
| 4   | L-leucinate          | Leu                                         |           |                     |
| 5   | L-isoleucinate       | Iso                                         |           |                     |
| 6   | L-phenylalaninate    | Phe                                         |           |                     |
| 7   | L-prolinate          | Pro                                         |           |                     |
| 8   | L-lysinate           | Lys                                         |           |                     |
| 9   | L-argininate         | Arg                                         |           |                     |
| 10  | L-histidinate        | His                                         |           |                     |
| 11  | L-tryptophan         | Try                                         |           |                     |
| 12  | L-serinate           | Ser                                         |           |                     |
| 13  | L-tyrosinate         | Tyr                                         |           |                     |
| 14  | L-cysteininate       | Cys                                         |           |                     |
| 15  | Oleic acid           | Ole                                         |           |                     |
| 16  | Dihydrogen phosphate | H <sub>2</sub> PO <sub>4</sub> <sup>-</sup> |           |                     |
| 17  | L-glutamate          | Glu                                         |           |                     |
| 18  | Pyrrrole             | Pyrr                                        |           |                     |
| 19  | Imidazole            | Im                                          |           |                     |
| 20  | Phenol               | PhO                                         |           |                     |
